# Supplementary material for: A new GWAS and meta-analysis with 1000Genomes imputation identifies novel risk variants for colorectal cancer
Source: PubMed Central journal article supplement (PMC4438486; doi:10.1038/srep10442), 2015-05-20
Supplement: srep10442-s1.pdf [file srep10442-s1.pdf]

## SUPPLEMENTARY MATERIAL

### **A new GWAS and meta-analysis with 1000Genomes imputation identifies novel risk variants for colorectal cancer**

Nada A. Al-Tassan<sup>1†</sup>, Nicola Whiffin<sup>2†</sup>, Fay J. Hosking<sup>2†</sup>, Claire Palles<sup>3</sup>, Philip Law<sup>1</sup>, Susan M. Farrington<sup>4</sup>, Sara E. Dobbins<sup>2</sup>, Rebecca Harris<sup>5</sup>, Maggie Gorman<sup>3</sup>, Albert Tenesa<sup>4,6</sup>, Brian F. Meyer<sup>1</sup>, Salma M. Wakil<sup>1</sup>, Ben Kinnersley<sup>2</sup>, Harry Campbell<sup>7</sup>, Lynn Martin<sup>3</sup>, Christopher G. Smith<sup>5</sup>, Shelley Idziaszczyk<sup>5</sup>, Ella Barclay<sup>3</sup>, Timothy S. Maughan<sup>8</sup>, Richard Kaplan<sup>9</sup>, Rachel Kerr<sup>10</sup>, David Kerr<sup>11</sup>, Daniel D. Buchannan<sup>12,13</sup>, Aung Ko Win<sup>13</sup>, John Hopper<sup>13</sup>, Mark Jenkins<sup>13</sup>, Noralane M. Lindor<sup>14</sup>, Polly A. Newcomb<sup>15</sup>, Steve Gallinger<sup>16</sup>, David Conti<sup>17</sup>, Fred Schumacher<sup>17</sup>, Graham Casey<sup>17</sup>, Malcolm G. Dunlop<sup>4‡</sup>, Ian P. Tomlinson<sup>3‡</sup>, Jeremy P. Cheadle<sup>5‡</sup> and Richard S Houlston<sup>2‡\*</sup>

## **SUPPLEMENTARY METHODS**

### **Ethics statement**

Collection of blood samples and clinico-pathological information from all subjects was undertaken with informed consent and ethical review board approval in accordance with the tenets of the Declaration of Helsinki.

### **Subjects and datasets**

In all cases CRC was defined according to the 9th revision of the International Classification of Diseases (ICD) by codes 153–154.

### **COIN**

The COIN GWAS was based on 2,244 CRC cases (64% male, mean age 61 years, SD=10) ascertained through two independent Medical Research Council clinical trials of advanced/metastatic CRC; COIN and COIN-B (9). COIN patients were randomised 1:1:1 to receive continuous oxaliplatin and fluoropyrimidine chemotherapy, continuous chemotherapy plus cetuximab, or intermittent chemotherapy. COIN-B patients were randomised 1:1 to receive intermittent chemotherapy and cetuximab or intermittent chemotherapy and continuous cetuximab. All patients gave informed consent for their samples to be used for bowel cancer research (approved by REC [04/MRE06/60]).

DNA was extracted from EDTA-venous blood samples using conventional methods and quantified using Nanodrop spectrophotometry (Thermo Scientific, MA, USA). Cases were genotyped using Affymetrix Axiom Arrays according to the manufacturer's recommendations (Affymetrix, Santa Clara, CA 95051, USA) at the King Faisal Specialist Hospital and Research Center, Saudi Arabia (under IRB approval 2110033). Genotyping quality control was tested using duplicate DNA samples, together with direct sequencing of significantly associated SNPs in a subset of samples to confirm genotyping accuracy. For all SNPs, >99% concordant results were obtained.

For controls, we made use of publicly accessible Affymetrix 6.0 array data generated by the Wellcome Trust Case Control Consortium 2 (WTCCC2) on 2,674 individuals from the UK Blood Service Control Group. We excluded individuals from analysis if they failed one or more of the following thresholds: overall successfully genotyped SNPs < 95% (n = 122), discordant sex information (n = 8), classed as out of bounds by Affymetrix (n = 30), duplication or cryptic relatedness (identity by descent >0.185, n = 4), and evidence of non-

white European ancestry by PCA-based analysis in comparison with HapMap samples ( $n = 130$ ; cut-off based on the minimum and maximum values of the top two principal components of the controls; Supplementary Figure 2). We excluded SNPs from analysis if they failed one or more of the following thresholds: call rate  $<95\%$ ; different missing genotype rate between cases and controls at  $P < 10^{-5}$ ; MAF  $< 0.01$ ; departure from Hardy–Weinberg equilibrium in controls at  $P < 10^{-5}$ . The details of all sample exclusions are provided in Supplementary Figure 3. The adequacy of the case–control matching and the possibility of differential genotyping of cases and controls were assessed using Q–Q plots of test statistics. The inflation factor  $\lambda_{GC}$  was calculated by dividing the median of the lower 90% of the test statistics by the median of the lower 90% of the expected values from a  $\chi^2$  distribution with 1 d.f.

### **Published GWAS**

UK1 (CORGI) (7) comprised 940 cases with colorectal neoplasia (47% male) ascertained through the Colorectal Tumour Gene Identification (CoRGI) consortium. All had at least one first-degree relative affected by CRC and one or more of the following phenotypes: CRC at age 75 or less; any colorectal adenoma (CRAAd) at age 45 or less;  $\geq 3$  colorectal adenomas at age 75 or less; or a large ( $>1$  cm diameter) or aggressive (villous and/or severely dysplastic) adenoma at age 75 or less. The 965 controls (45% male) were spouses or partners unaffected by cancer and without a personal family history (to second degree relative level) of colorectal neoplasia. Known dominant polyposis syndromes, HNPCC/Lynch syndrome or bi-allelic MUTYH mutation carriers were excluded. All cases and controls were of white UK ethnic origin.

Scotland1 (COGS) (7) included 1,012 CRC cases (51% male; mean age at diagnosis 49.6 years,  $SD \pm 6.1$ ) and 1,012 cancer-free population controls (51% male; mean age 51.0 years;  $SD \pm 5.9$ ). Cases were selected for early age at onset (age  $\leq 55$  years). Known dominant polyposis syndromes, HNPCC/Lynch syndrome or bi-allelic MUTYH mutation carriers were excluded. Control subjects were sampled from the Scottish population NHS registers, matched by age ( $\pm 5$  years), gender and area of residence within Scotland.

VQ58 comprised 1800 CRC cases (1,099 males, mean age of diagnosis 62.5 years;  $SD \pm 10.9$ ) from the VICTOR (33) and QUASAR2 ([www.octooxford.org.uk/alltrials/trials/q2.html](http://www.octooxford.org.uk/alltrials/trials/q2.html)) trials and 2,690 population control genotypes (1,391 male) from the Wellcome Trust Case–Control Consortium 2 (WTCCC2) 1958 birth cohort (11) (also known as the National Child Development Study), which included all births in England, Wales and Scotland during a single week in 1958.

The CCFR1 data set comprised 1,290 familial CRC cases and 1,055 controls from the Colon Cancer Family Registry (<http://coloncfr.org>) (12). The cases were recently diagnosed CRC

cases reported to population complete cancer registries in the USA (Puget Sound, Washington State) were recruited by the Seattle Familial Colorectal Cancer Registry; in Canada (Ontario) who were recruited by the Ontario Familial Cancer Registry; and in Australia (Melbourne, Victoria) who were recruited by the Australasian Colorectal Cancer Family Study. Controls were population-based and for this analysis were restricted to those without a family history of CRC. The CCFR2 data set comprised a further 796 cases from the Colon Cancer Family Registry, recruited from centres in Australia, Ontario, Seattle, USC, Mayo and Hawaii, and 2,236 controls from the Cancer Genetic Markers of Susceptibility studies of breast (n=1,142) and prostate (n = 1,094) cancer (13, 14) . All subjects included in CCFR1 and CCFR2 were non-Hispanic white.

The VQ, UK1 and Scotland1 GWA cohorts were genotyped using Illumina Hap300, Hap240S, Hap370, Hap550 or Omni2.5M arrays. 1958BC genotyping was performed as part of the WTCCC2 study on Hap1.2M-Duo Custom arrays. The CCFR samples were genotyped using Illumina Hap1M, Hap1M-Duo or Omni-express arrays. CGEMS samples were genotyped using Illumina Hap300 and Hap240 or Hap550 arrays. After applying the same quality control as that performed for COIN and COIN-B, data on 7,577 CRC cases and 9,979 controls were available for the meta-analysis (Supplementary Figure 1).

### **Statistical and bioinformatic analysis**

Analyses were primarily undertaken using R (v3.02) and SNPTEST (v2.4.1) and PLINK(34) software. The association between each SNP and the risk of CRC was assessed by the Cochran–Armitage trend test. ORs and associated 95% CIs were calculated by unconditional logistic regression. Phasing of GWAS SNP genotypes was performed using SHAPEIT v2.644. Prediction of the untyped SNPs was carried out using IMPUTEv2 (v2.3.0) based on the data from the 1000 Genomes Project (Phase 1 integrated variant set, v3.20101123, released on the IMPUTEv2 website on 9 December 2013) as reference. Imputed data were analysed using SNPTEST v2.4.1 to account for uncertainties in SNP prediction. Association meta-analyses only included markers with info scores >0.4, imputed call rates/SNP >0.9 and MAFs >0.01. The fidelity of imputation, as assessed by the concordance between imputed and sequenced SNPs, was examined in a subset of 200 UK cases.

Meta-analyses were carried out using META v2.4-1, using the genotype probabilities from IMPUTEv2, where a SNP was not directly typed. We calculated Cochran's Q statistic to test for heterogeneity and the  $I^2$  statistic to quantify the proportion of the total variation that was caused by heterogeneity (35).  $I^2$  values  $\geq 75\%$  are considered characteristic of large heterogeneity (35-37). Associations by sex, age and clinico-pathological phenotypes were examined by logistic regression in case-only analyses. LD blocks were defined on the basis of HapMap recombination rate (cM/Mb) as defined using the Oxford recombination hotspots and on the basis of the distribution of CIs defined by Gabriel et al (37).

The familial relative risk of CRC attributable to a variant was calculated using the formula (38):

$$\lambda^* = \frac{p(pr_2 + qr_1)^2 + q(pr_1 + q)^2}{(p^2r_2 + 2pqr_1 + q^2)^2}$$

where  $p$  is the population frequency of the minor allele,  $q=1-p$ , and  $r_1$  and  $r_2$  are the relative risks (approximated by ORs) for heterozygotes and the rarer homozygotes relative to the more common homozygotes respectively. From  $\lambda^*$ , it is possible to quantify the influence of the locus on the overall familial risk of CRC in first-degree relatives of CRC patients. Assuming a multiplicative interaction between risk alleles, the proportion of the overall familial risk attributable to the locus is given by  $\log(\lambda^*)/\log(\lambda_0)$ , where  $\lambda_0$ , the overall familial risk of CRC, shown in epidemiological studies is 2.2 (39).

To explore epigenetic profiles of association signals, we used ChromHMM (40). States were inferred from ENCODE Histone Modification data on the CRC cell line HCT116 (DNase, H3K4me3, H3K4me1, H3K27ac, Pol2 and CTCF) binarized using a multivariate Hidden Markov Model.

To examine whether any of the SNPs or their proxies (i.e.  $r_2 > 0.8$  in 1000genomes CEU reference panel) annotate putative transcription factor binding/enhancer elements we used the CADD (combined annotation dependent depletion) webserver (16) which integrates information from the Ensembl Variant Effect Predictor (VEP) (41) and ENCODE (42). We assessed sequence conservation using PhastCons (score  $< 0.3$  indicative of conservation) and Genomic Evolutionary Rate Profiling (GERP). GERP scores ( $-12$  to  $6$ , with  $6$  being indicative of complete conservation) reflect the proportion of substitutions at that site rejected by selection compared with observed substitutions expected under a neutral evolutionary model, based on sequence alignment of 34 mammalian species (43). We also derived CADD scores to assess functionality of non-coding changes (CADD score  $> 10.0$  deemed to be deleterious).

## **Analysis of TCGA data**

### ***Relationship between SNP genotype and mRNA expression.***

To examine for a relationship between SNP genotype and mRNA expression we made use of Tumor Cancer Genome Atlas (TCGA) RNA-seq expression and Affymetrix 6.0 SNP data (dbGaP accession number: phs000178.v7.p6) on 223 colorectal adenocarcinoma (COAD) and 75 rectal adenocarcinoma samples using a best proxy where SNPs were not represented directly. Association between normalised RNA counts per-gene and SNP genotype was quantified using the Kruskal-Wallis trend test.

### ***Mutation frequency.***

The frequency of somatic mutations in CRC was obtained using the CBioPortal for Cancer Genomics and TumorPortal web servers.

### ***Pathway analysis***

To determine whether any genes mapping to the three newly identified regions act in pathways already over-represented in GWAS regions we utilized the NCI pathway interaction database (<http://pid.nci.nih.gov/index.shtml>). All genes within the LD block containing each tagSNP, or linked to the SNP through functional experiments (MYC) were submitted as a Batch query using the NCI-Nature curated data source.

### ***Assignment of microsatellite instability (MSI), KRAS, NRAS and BRAF status in cancers***

Tumour MSI status in CRCs was determined using the mononucleotide microsatellite loci BAT25 and BAT26, which are highly sensitive MSI markers. Briefly, 10 µm sections were cut from formalin-fixed paraffin-embedded CRC tumours, lightly stained with toluidine blue and regions containing at least 60% tumour microdissected. Tumour DNA was extracted using the QIAamp DNA Mini kit (Qiagen, Crawley, UK) according to the manufacturer's instructions and genotyped for the BAT25 and BAT26 loci using 32P-labelled oligonucleotide primers or FAM-labelled BAT26 and HEX-labelled BAT25 primers with visualisation on an ABI 3100 (Life Technologies, CA, USA). Samples showing more than or equal to five novel alleles, when compared with normal DNA, at either or both markers were assigned as MSI-H (corresponding to MSI-high)(44).

Tumours from the COIN study were screened for mutations in KRAS codons 12, 13, and 61 and BRAF codon 600 by pyrosequencing (9). Additionally, KRAS (all three codons), BRAF (codons 594 and 600), and NRAS (codons 12 and 61) were screened for mutations by MALDI-TOF mass array (Sequenom, San Diego, CA, USA) (45).

## **SUPPLEMENTARY TABLE AND FIGURE LEGENDS**

### **Supplementary Table 1: Individual variance in risk associated with colorectal cancer SNPs**

**Supplementary Table 2: Summary of the sample sets used in the study.** The numbers shown are after stringent QC measures (Supplementary Figure 3).

### **Supplementary Table 3: Best association signals from previously published risk loci**

(A): Previously published risk loci discovered in European populations. Shown for each region are the GWAS tagSNP, the most associated variant within a 500kb window in the imputation and the associated odds ratio and P-values associated with each along with the linkage disequilibrium metrics between the SNPs. Imputation was not carried out on the X chromosome so this locus was not included. Genes with an asterisk (\*) were also found to be significant in East Asian populations.

(B): Previously published risk loci discovered in East Asian populations. Shown for each region are the GWAS SNPs with the associated odds ratio and P-values for both the reported study and this study. RAF in the EUR population were obtained from the 1000 Genomes Project, and are shown in parentheses.

### **Supplementary Table 4: Relationship between SNP genotype and gene expression from RNA-seq data in 223 colon and 75 rectal cancers.**

**Supplementary Table 5: Summary of genomic annotation by CADD.** Data are shown for rs72647484, rs16941835 and rs10904849 (in red) and proxy SNPs ( $r^2 > 0.8$  in 1000 Genomes

phase 1 data) demonstrating evidence of histone marks, transcription factor occupancy and evolutionary conservation (GERP and PhastCons). Also indicated are RegulomeDB and CADD scores.

**Supplementary Table 6: Pathways overrepresented in GWAS regions.** All genes within the LD block containing each tagSNP, or linked to the SNP through functional experiments, were uploaded to the NCI pathway interaction database. Displayed are pathways containing three or more genes.

**Supplementary Table 7: Relationship between SNP genotype and sex, age at diagnosis of CRC, tumor site (rectal [ICD9:154], colonic [ICD9:153]), stage, family history of CRC ( $\geq 1$  affected first degree relative), MSI status and both KRAS and BRAF mutant status.**

**Supplementary Figure 1: Quantile-Quantile (Q-Q) plots of observed and expected  $\chi^2$  values of association between SNP genotype and colorectal cancer risk.** (a) UK1, (b) Scotland1, (c) VQ58, (d) CCFR1, (e) CCFR2, (f) COIN, (g) UK1 after imputation, (h) Scotland1 after imputation, (i) VQ58 after imputation, (j) CCFR1 after imputation, (k) CCFR2 after imputation, (l) COIN after imputation and (m) Meta-analysis.

**Supplementary Figure 2: Identification of individuals of non-European ancestry in cases and controls.** The first two principal components of the analysis are plotted. (a) UK1, (b) Scotland1, (c) VQ58, (d) CCFR1, (e) CCFR2 and (f) COIN. HapMap CEU individuals are plotted in blue; CHB+JPT individuals are plotted in green; YRI individuals are plotted in red; GWAS cases are plotted as circles and controls as triangles.



**Supplementary Figure 3: Details of the quality control filters applied to each GWAS.**

Samples were excluded due to call rate (<95% or failed genotyping), Ethnicity (principle components analysis or other samples reported to be not of white, European descent), Relatedness (any individuals found to be duplicated or related within or between data sets through IBS), sex discrepancies or others (cases found to contain a previously reported susceptibility allele, controls with a 1<sup>st</sup> degree relative with CRC, low concordance of genotyping in duplicates or samples which have been subsequently withdrawn from a study).

**Supplementary Table 1: Individual variance in risk associated with colorectal cancer SNPs**

| Locus    | dbSNP No.  | Gene             | Risk-Allele Frequency | Relative Risk per Allele | % of Total Variance in Risk Explained‡ | Reference |
|----------|------------|------------------|-----------------------|--------------------------|----------------------------------------|-----------|
| 1q25.3   | rs10911251 | LAMC1            | 0.57                  | 1.05                     | 0.08                                   | 1         |
| 1q41     | rs6691170  | DUSP10           | 0.34                  | 1.08                     | 0.2                                    | 2         |
| 3q26.2   | rs10936599 | TERC, MYNN       | 0.76                  | 1.08                     | 0.17                                   | 2         |
| 6p21.31  | rs1321311  | CDKN1A           | 0.23                  | 1.11                     | 0.26                                   | 3         |
| 8q23.3   | rs16892766 | EIF3H            | 0.08                  | 1.23                     | 0.43                                   | 4         |
| 8q24.21  | rs6983267  | MYC              | 0.49                  | 1.18                     | 0.91                                   | 5         |
| 10p14    | rs10795668 | GATA3            | 0.66                  | 1.15                     | 0.63                                   | 4         |
| 10q24.2  | rs1035209  | SLC25A28, NKX2-3 | 0.19                  | 1.15                     | 0.39                                   | 6         |
| 11q13.4  | rs3824999  | POLD3            | 0.5                   | 1.15                     | 0.65                                   | 3         |
| 11q23.1  | rs3802842  | FLJ45803         | 0.68                  | 1.14                     | 0.48                                   | 7         |
| 12p13.32 | rs3217810  | CCND2            | 0.12                  | 1.07                     | 0.07                                   | 1         |
| 12q13.13 | rs11169552 | DIP2B, ATF1      | 0.74                  | 1.1                      | 0.23                                   | 2         |
| 14q22.2  | rs4444235  | BMP4             | 0.45                  | 1.1                      | 0.32                                   | 8         |
| 15q14    | rs4779584  | GREM1, SCG5      | 0.82                  | 1.18                     | 0.56                                   | 4         |
| 16q22.1  | rs9929218  | CDH1             | 0.69                  | 1.09                     | 0.2                                    | 8         |
| 18q21.2  | rs4939827  | SMAD7            | 0.52                  | 1.22                     | 1.3                                    | 9         |
| 19q12    | rs10411210 | RHPN2, GPATCH1   | 0.91                  | 1.12                     | 0.14                                   | 8         |
| 20p12.3  | rs961253   | BMP2             | 0.37                  | 1.11                     | 0.36                                   | 8         |
| 20p12.3  | rs4813802  | BMP2             | 0.36                  | 1.11                     | 0.33                                   | 10        |
| 20q13.33 | rs4925386  | LAMA5            | 0.31                  | 1.1                      | 0.27                                   | 2         |
|          |            |                  |                       |                          | 7.98                                   |           |

For a single allele ( $i$ ) of frequency  $p$ , relative risk  $R$  and log risk  $r$ , the variance ( $V_i$ ) of the risk distribution due to that allele is given by

$$V_i = (1 - p)^2 E^2 + 2p(1 - p)(r - E)^2 + p^2(2r - E)^2$$

Where  $E$  is the expected value of  $r$  given by

$$E = 2p(1 - p)r + 2p^2r$$

For multiple risk alleles the distribution of risk in the population tends towards the normal with variance

$$V = \sum V_i$$

The total genetic variance ( $V$ ) for all susceptibility alleles has been estimated to be  $\sqrt{2.2}$ . Thus the fraction of the genetic risk explained by a single allele is given by

$$V_i/V$$

‡ Method from Pharoah P *et al* N Eng J Med 2008; 358:2796-803. Familial risk of CRC assumed to be 2.2 (Johns LE, Houlston RS. Am J Gastroenterol. 2001; 96:2992-03).

## REFERENCES

1. Peters et al. *Identification of Genetic Susceptibility Loci for Colorectal Tumors in a Genome-Wide Meta-analysis*. Gastroenterology, 2013. **144**(4): p. 799-807
2. Houlston et al. *Meta-analysis of three genome-wide association studies identifies susceptibility loci for colorectal cancer at 1q41, 3q26.2, 12q13.13 and 20q13.33*. Nat Gen, 2010. **42**(11): p. 973-7
3. Dunlop et al. *Common variation near CDKN1A, POLD3 and SHROOM2 influences colorectal cancer risk*. Nat Gen, 2012. **44**(7): p. 770-6
4. Tomlinson et al. *A genome-wide association study identifies colorectal cancer susceptibility loci on chromosomes 10p14 and 8q23.3*. Nat Gen, 2008. **40**(5): p. 623-30
5. Tomlinson et al. *A genome-wide association scan of tag SNPs identifies a susceptibility variant for colorectal cancer at 8q24.21*. Nat Gen, 2007. **39**(8): p. 984-8
6. Whiffin et al. *Identification of susceptibility loci for colorectal cancer in a genome-wide meta-analysis*. Hum Mol Genet, 2014. **23**(17): p. 4729-37
7. Tenesa et al. *Genome-wide association scan identifies a colorectal cancer susceptibility locus on 11q23 and replicates risk loci at 8q24 and 18q21*. Nat Gen, 2008. **40**(5): p. 631-7
8. Houlston et al. *Meta-analysis of genome-wide association data identifies four new susceptibility loci for colorectal cancer*. Nat Gen, 2008. **40**(12): p. 1426-35
9. Broderick et al. *A genome-wide association study shows that common alleles of SMAD7 influence colorectal cancer risk*. Nat Gen, 2007. **39**(11): p. 1315-7
10. Tomlinson et al. *Multiple Common Susceptibility Variants near BMP Pathway Loci GREM1, BMP4, and BMP2 Explain Part of the Missing Heritability of Colorectal Cancer*. PLoS Genetics, 2011. **7**(6)

**Supplementary Table 2: Summary of the sample sets used in the study.** The numbers shown are after stringent QC measures (Supplementary Figure 3).

| Study            | Cases | Controls | GWAS Chip                        | Inflation factor ( $\lambda$ ) <sup>*</sup> |                  |
|------------------|-------|----------|----------------------------------|---------------------------------------------|------------------|
|                  |       |          |                                  | Before Imputation                           | After imputation |
| <b>UK1</b>       | 890   | 900      | Illumina Hap550                  | 1.02                                        | 1.03             |
| <b>Scotland1</b> | 973   | 998      | Illumina Hap300/240S             | 1.01                                        | 1.04             |
| <b>VQ58</b>      | 1,794 | 2,686    | Illumina Hap300/370, Illumina 1M | 1.01                                        | 1.04             |
| <b>CCFR1</b>     | 1,175 | 999      | Illumina 1M, 1M Duo              | 1.02                                        | 1.03             |
| <b>CCFR2</b>     | 795   | 2,234    | Illumina 1M, Omni express        | 1.03                                        | 1.08             |
| <b>COIN</b>      | 1,950 | 2,162    | Affymetrix Axiom                 | 1.05                                        | 1.10             |
| <b>Overall</b>   | 7,577 | 9,979    | -                                | 1.03                                        | 1.07             |

\* Inflation factors ( $\lambda$ ) were calculated by dividing the mean of the lower 90% of the test statistics by the mean of the lower 90% of the expected values from a  $\chi^2$  distribution with 1 d.f. Only SNPs with minor allele frequency > 0.05, imputation INFO >0.4, *P*-heterogeneity>0.01 and *P*-HWE>0.01 were considered in calculations.

**Supplementary Table 3: Best association signals from previously published risk loci.**

**(A): Previously published risk loci discovered in European populations.** Shown for each region are the GWAS tagSNP, the most associated variant in the imputation and the associated odds ratio and *P*-values associated with each along with the linkage disequilibrium metrics between the SNPs. Imputation was not carried out on the X chromosome so this locus was not included. Genes with an asterisk (\*) were also found to be significant in East Asian populations.

| Locus    | Nearest Gene(s)    | GWAS tagSNP | Lead variant this study | Location (bp)              | r2 with tagSNP | D' with tagSNP | Risk Allele | Alt Allele | RAF  | metaOR | metaP                  | Reference |
|----------|--------------------|-------------|-------------------------|----------------------------|----------------|----------------|-------------|------------|------|--------|------------------------|-----------|
| 1q25.3   | LAMC1 *            | rs10911251  | rs78164010              | 183,081,194<br>183,117,398 | 0.08           | -              | A           | C          | 0.54 | 1.09   | 1.75x10 <sup>-2</sup>  | 1         |
|          |                    |             |                         |                            |                |                | A           | T          | 0.01 | 1.34   | 7.43x10 <sup>-5</sup>  |           |
| 1q41     | DUSP10 *           | rs6691170   | rs11118883              | 222,045,446                | 0.40           | 0.75           | T           | G          | 0.40 | 1.08   | 1.05x10 <sup>-4</sup>  | 2         |
|          |                    |             |                         | 222,061,022                |                |                | A           | G          | 0.35 | 1.12   | 5.43x10 <sup>-6</sup>  |           |
| 3q26.2   | TERC, MYNN         | rs10936599  | chr3:169539272:D        | 169,492,101                | -              | -              | C           | T          | 0.75 | 1.11   | 7.43x10 <sup>-5</sup>  | 2         |
|          |                    |             |                         | 169,539,272                |                |                | AT          | A          | 0.80 | 1.12   | 6.07x10 <sup>-6</sup>  |           |
| 6p21.31  | CDKN1A             | rs1321311   | rs9918353               | 36,622,900                 | 0.96           | 1.00           | T           | G          | 0.21 | 1.09   | 2.75x10 <sup>-4</sup>  | 3         |
|          |                    |             |                         | 36,622,677                 |                |                | C           | A          | 0.21 | 1.09   | 1.69x10 <sup>-4</sup>  |           |
| 8q23.3   | EIF3H *            | rs16892766  | rs76316943              | 117,630,683                | 0.07           | -              | C           | A          | 0.09 | 1.25   | 6.03x10 <sup>-9</sup>  | 4         |
|          |                    |             |                         | 117,848,307                |                |                | A           | G          | 0.01 | 1.58   | 1.82x10 <sup>-11</sup> |           |
| 8q24.21  | MYC *              | rs6983267   | rs7014346               | 128,413,305                | 0.44           | 1.00           | G           | T          | 0.52 | 1.18   | 1.61x10 <sup>-13</sup> | 5         |
|          |                    |             |                         | 128,424,792                |                |                | A           | G          | 0.34 | 1.19   | 5.71x10 <sup>-15</sup> |           |
| 10p14    | GATA3 *            | rs10795668  | rs11255841              | 8,701,219                  | 0.86           | 0.96           | G           | A          | 0.67 | 1.16   | 1.94x10 <sup>-10</sup> | 4         |
|          |                    |             |                         | 8,739,580                  |                |                | T           | A          | 0.68 | 1.18   | 4.32x10 <sup>-13</sup> |           |
| 10q24.2  | SLC25A28, NKX2-3 * | rs1035209   | rs11190164              | 101,345,366                | 0.42           | 0.86           | T           | C          | 0.20 | 1.15   | 1.56x10 <sup>-6</sup>  | 6         |
|          |                    |             |                         | 101,351,704                |                |                | G           | A          | 0.29 | 1.13   | 7.91x10 <sup>-7</sup>  |           |
| 11q13.4  | POLD3              | rs3824999   | chr11:74303133:D        | 74,345,550                 | -              | -              | C           | A          | 0.47 | 1.15   | 8.23x10 <sup>-11</sup> | 3         |
|          |                    |             |                         | 74,303,133                 |                |                | C           | CG         | 0.50 | 1.15   | 2.87x10 <sup>-12</sup> |           |
| 11q23.1  | FLJ45803 *         | rs3802842   | chr11:111172236:D       | 111,171,709                | -              | -              | C           | A          | 0.27 | 1.13   | 1.76x10 <sup>-6</sup>  | 7         |
|          |                    |             |                         | 111,172,236                |                |                | ATGTGCAATG  | A          | 0.28 | 1.14   | 2.37x10 <sup>-7</sup>  |           |
| 12p13.32 | CCND2 *            | rs3217810   | rs3217810               | 4,388,271                  | -              | -              | T           | C          | 0.12 | 1.16   | 9.97x10 <sup>-6</sup>  | 1         |
| 12q13.13 | DIP2B, ATF1        | rs11169552  | rs4768903               | 51,155,663                 | 0.51           | 0.80           | C           | T          | 0.75 | 1.08   | 4.05x10 <sup>-5</sup>  | 2         |
|          |                    |             |                         | 51,045,449                 |                |                | A           | G          | 0.61 | 1.10   | 4.22x10 <sup>-8</sup>  |           |
| 14q22.2  | BMP4               | rs4444235   | rs35107139              | 54,410,919                 | 0.64           | 1.00           | C           | T          | 0.48 | 1.09   | 7.22x10 <sup>-5</sup>  | 8         |
|          |                    |             |                         | 54,419,106                 |                |                | C           | A          | 0.40 | 1.10   | 2.41x10 <sup>-6</sup>  |           |

|                 |                         |                  |            |      |      |      |      |                       |      |                        |   |
|-----------------|-------------------------|------------------|------------|------|------|------|------|-----------------------|------|------------------------|---|
| <b>15q13.3</b>  | <i>GREM1, SCG5</i>      | rs4779584        | 32,994,756 | 0.71 | 0.87 | T    | C    | 0.19                  | 1.19 | $1.45 \times 10^{-9}$  | 4 |
|                 |                         | rs2293582        | 33,010,412 |      |      | A    | G    | 0.21                  | 1.21 | $2.57 \times 10^{-11}$ |   |
| <b>16q22.1</b>  | <i>CDH1</i>             | rs9929218        | 68,820,946 | 0.33 | -    | G    | A    | 0.71                  | 1.09 | $3.60 \times 10^{-4}$  | 8 |
|                 |                         | rs4783684        | 68,833,888 |      |      | C    | G    | 0.68                  | 1.08 | $1.48 \times 10^{-4}$  |   |
| <b>18q21.2</b>  | <i>SMAD7 *</i>          | rs4939827        | 46,453,463 | 1.00 | 1.00 | T    | C    | 0.53                  | 1.24 | $7.84 \times 10^{-21}$ | 9 |
|                 |                         | rs7226855        | 46,454,048 |      |      | A    | G    | 0.55                  | 1.25 | $4.09 \times 10^{-23}$ |   |
| <b>19q13.11</b> | <i>RHPN2, GPATCH1 *</i> | rs10411210       | 33,532,300 | -    | -    | C    | T    | 0.90                  | 1.18 | $4.68 \times 10^{-5}$  |   |
|                 |                         | chr19:33491901:D | 33,491,901 |      |      | GTAT | G    | 0.79                  | 1.13 | $4.58 \times 10^{-5}$  |   |
| <b>20p12.3</b>  | <i>BMP2 *</i>           | rs961253         | 6,404,281  | 0.80 | 0.93 | A    | C    | 0.37                  | 1.10 | $4.89 \times 10^{-5}$  | 8 |
|                 |                         | rs57046232       | 6,380,344  |      |      | T    | A    | 0.37                  | 1.11 | $5.05 \times 10^{-7}$  |   |
|                 |                         | rs4813802        | 6,699,595  | G    | T    | 0.34 | 1.12 | $2.54 \times 10^{-6}$ | 8    |                        |   |
|                 |                         | rs1015563        | 6,690,101  | T    | C    | 0.35 | 1.12 | $1.90 \times 10^{-6}$ |      |                        |   |
| <b>20q13.33</b> | <i>LAMA5</i>            | rs4925386        | 60,921,044 | 0.40 | 0.72 | C    | T    | 0.68                  | 1.12 | $1.37 \times 10^{-7}$  | 2 |
|                 |                         | rs2427308        | 60,969,451 |      |      | C    | T    | 0.78                  | 1.19 | $3.35 \times 10^{-11}$ |   |

**(B): Previously published risk loci discovered in East Asian populations.** Shown for each region are the GWAS SNPs with the associated odds ratio and *P*-values for both the reported study and this study. RAF in the EUR population were obtained from the 1000 Genomes Project, and are shown in parentheses

| Locus    | Nearest Gene(s)     | GWAS SNP   | Location (bp) | Risk Allele | Alt Allele | RAF            | Reported OR | Reported <i>P</i>    | OR   | <i>P</i>              | Reference |
|----------|---------------------|------------|---------------|-------------|------------|----------------|-------------|----------------------|------|-----------------------|-----------|
| 5q31.1   | <i>C5orf66</i>      | rs647161   | 134,499,092   | A           | C          | 0.31<br>(0.66) | 1.15        | 2x10 <sup>-14</sup>  | 1.06 | 1.68x10 <sup>-2</sup> | 11        |
| 6q25.3   | <i>SLC22A3</i>      | rs7758229  | 160,840,252   | T           | G          | 0.25<br>(0.32) | 1.28        | 8x10 <sup>-9</sup>   | 1.01 | 6.57x10 <sup>-1</sup> | 12        |
| 10q22.3  | <i>ZMIZ1-AS1</i>    | rs704017   | 80,819,132    | G           | A          | 0.32<br>(0.56) | 1.10        | 2x10 <sup>-8</sup>   | 1.07 | 2.49x10 <sup>-3</sup> | 13        |
| 10q25    | <i>VT11A</i>        | rs12241008 | 114,208,702   | C           | T          | 0.28<br>(0.10) | 1.19        | 2.9x10 <sup>-8</sup> | 1.13 | 1.71x10 <sup>-3</sup> | 14        |
| 11q12.2  |                     | rs174550   | 61,552,680    | G           | A          | 0.59<br>(0.35) | 1.16        | 9x10 <sup>-21</sup>  | 1.08 | 1.06x10 <sup>-3</sup> | 13        |
| 12p13.31 | <i>LOC102723767</i> | rs10849432 | 6,385,727     | T           | C          | 0.82<br>(0.90) | 1.14        | 6x10 <sup>-10</sup>  | 1.02 | 6.86x10 <sup>-1</sup> | 13        |
| 12p13.33 | <i>WNK1</i>         | rs12309274 | 975,948       | T           | G          | 0.85<br>(0.86) | 1.11        | 3x10 <sup>-6</sup>   | 1.07 | 3.64x10 <sup>-2</sup> | 13        |
| 17p13.3  | <i>NXN</i>          | rs12603526 | 800,593       | C           | T          | 0.3<br>(0.01)  | 1.10        | 3x10 <sup>-8</sup>   | 1.04 | 5.71x10 <sup>-1</sup> | 13        |
| 19q13.2  |                     | rs1800469  | 41,860,296    | G           | A          | 0.48<br>(0.69) | 1.09        | 1x10 <sup>-8</sup>   | 1.07 | 8.68x10 <sup>-3</sup> | 13        |

## REFERENCES

1. Peters et al. *Identification of Genetic Susceptibility Loci for Colorectal Tumors in a Genome-Wide Meta-analysis.* Gastroenterology, 2013. **144**(4): p. 799-807
2. Houlston et al. *Meta-analysis of three genome-wide association studies identifies susceptibility loci for colorectal cancer at 1q41, 3q26.2, 12q13.13 and 20q13.33.* Nat Gen, 2010. **42**(11): p. 973-7

3. Dunlop et al. *Common variation near CDKN1A, POLD3 and SHROOM2 influences colorectal cancer risk*. Nat Gen, 2012. **44**(7): p. 770-6
4. Tomlinson et al. *A genome-wide association study identifies colorectal cancer susceptibility loci on chromosomes 10p14 and 8q23.3*. Nat Gen, 2008. **40**(5): p. 623-30
5. Tomlinson et al. *A genome-wide association scan of tag SNPs identifies a susceptibility variant for colorectal cancer at 8q24.21*. Nat Gen, 2007. **39**(8): p. 984-8
6. Whiffin et al. *Identification of susceptibility loci for colorectal cancer in a genome-wide meta-analysis*. Hum Mol Genet, 2014. **23**(17): p. 4729-37
7. Tenesa et al. *Genome-wide association scan identifies a colorectal cancer susceptibility locus on 11q23 and replicates risk loci at 8q24 and 18q21*. Nat Gen, 2008. **40**(5): p. 631-7
8. Houlston et al. *Meta-analysis of genome-wide association data identifies four new susceptibility loci for colorectal cancer*. Nat Gen, 2008. **40**(12): p. 1426-35
9. Broderick et al. *A genome-wide association study shows that common alleles of SMAD7 influence colorectal cancer risk*. Nat Gen, 2007. **39**(11): p. 1315-7
10. Tomlinson et al. *Multiple Common Susceptibility Variants near BMP Pathway Loci GREM1, BMP4, and BMP2 Explain Part of the Missing Heritability of Colorectal Cancer*. PLoS Genetics, 2011. **7**(6)
11. Jia et al. *Genome-wide association analyses in East Asians identify new susceptibility loci for colorectal cancer*. Nat Genet, 2013. **45**(2): p191-6
12. Cui et al. *Common variant in 6q26-q27 is associated with distal colon cancer in an Asian population*. Gut, 2011. **60**(6): p799-805
13. Zhang et al. *Large-scale genetic study in East Asians identifies six new loci associated with colorectal cancer risk*. Nat Genet, 2014. **46**(6): p533-42
14. Wang et al. *Trans-ethnic genome-wide association study of colorectal cancer identifies a new susceptibility locus in VTI1A*. Nat Commun, 2014. **5**: p4613



**Supplementary Table 4: Relationship between SNP genotype and gene expression from RNA-seq data in 223 colon and 75 rectal cancers.**

| <b>Variant</b> | <b>Proxy for</b> | <b>Gene</b>  | <b>Probe</b> | <b>P-Colon</b> | <b>P-Rectal</b> |
|----------------|------------------|--------------|--------------|----------------|-----------------|
| rs2744753      | rs72647484       | <i>WNT4</i>  | WNT4.54361   | 0.59           | 0.87            |
| rs2744753      | rs72647484       | <i>CDC42</i> | CDC42.998    | 0.95           | 0.38            |
| rs10904850     | rs10904849       | <i>CUBN</i>  | CUBN.8029    | 0.62           | 0.51            |
| rs16941835     | -                | <i>FOXL1</i> | FOXL1.2300   | 0.71           | 0.09            |

**Supplementary Table 5: Summary of genomic annotation by CADD.** Data are shown for rs72647484, rs16941835 and rs10904849 (in red) and proxy SNPs ( $r^2 > 0.8$  in 1000 Genomes phase 1 data) demonstrating evidence of histone marks, transcription factor occupancy and evolutionary conservation (GERP and PhastCons). Also indicated are RegulomeDB and CADD scores.

| Chr       | Position        | SNP               | $r^2$       | D'          | Ref      | Alt      | MAF         | Type                      | PhCons <sup>a</sup> | GERP <sup>b</sup> | H <sub>3</sub> K <sub>27</sub> Ac | H <sub>3</sub> K <sub>4</sub> Me | H <sub>3</sub> K <sub>4</sub> Me <sub>3</sub> | TFBS | Gene         | CADD Score <sup>c</sup> | Regulome DB score <sup>d</sup> |
|-----------|-----------------|-------------------|-------------|-------------|----------|----------|-------------|---------------------------|---------------------|-------------------|-----------------------------------|----------------------------------|-----------------------------------------------|------|--------------|-------------------------|--------------------------------|
| <b>1</b>  | <b>22587728</b> | <b>rs72647484</b> | <b>1.00</b> | <b>1.00</b> | <b>T</b> | <b>C</b> | <b>0.09</b> | <b>Regulatory Feature</b> | <b>0.02</b>         | <b>0.84</b>       | <b>4.00</b>                       | <b>5.32</b>                      | <b>2.88</b>                                   |      | <b>NA</b>    | <b>2.58</b>             | <b>6</b>                       |
| 1         | 22590009        | rs72647488        | 0.93        | 1.00        | G        | A        | 0.08        | Intergenic                | 0.00                | -1.52             | 6.00                              | 7.96                             | 3.00                                          |      | MIR4418      | 1.64                    | No data                        |
| 1         | 22590125        | rs72647489        | 0.93        | 1.00        | <b>T</b> | <b>C</b> | 0.08        | Intergenic                | 0.17                | -0.99             | 7.80                              | 7.56                             | 2.76                                          |      | MIR4418      | 8.21                    | No data                        |
| 10        | 16995872        | rs7903108         | 0.94        | 0.99        | G        | C        | 0.33        | Intronic                  | 0.12                | -0.43             | 5.12                              | 15.32                            | 2.84                                          |      | CUBN         | 2.06                    | No data                        |
| 10        | 16997246        | rs10904848        | 0.96        | 1.00        | C        | T        | 0.33        | Intronic                  | 0.01                | -1.33             | 2.00                              | 4.96                             | 2.16                                          |      | CUBN         | 0.70                    | 6                              |
| <b>10</b> | <b>16997266</b> | <b>rs10904849</b> | <b>1.00</b> | <b>1.00</b> | <b>G</b> | <b>T</b> | <b>0.32</b> | <b>Intronic</b>           | <b>0.00</b>         | <b>-0.45</b>      | <b>2.88</b>                       | <b>5.00</b>                      | <b>2.00</b>                                   |      | <b>CUBN</b>  | <b>0.19</b>             | <b>No data</b>                 |
| 10        | 16997707        | rs10904850        | 0.95        | 1.00        | G        | A        | 0.33        | Intronic                  | 0.01                | -1.70             | 3.00                              | 4.00                             | 3.44                                          |      | CUBN         | 3.08                    | No data                        |
| 10        | 16997827        | rs10904851        | 0.95        | 1.00        | <b>G</b> | A        | 0.33        | Intronic                  | 0.00                | -5.71             | 2.48                              | 7.92                             | 2.00                                          |      | CUBN         | 0.06                    | 5                              |
| 10        | 16998234        | rs10904852        | 0.95        | 1.00        | A        | G        | 0.33        | Intronic                  | 0.47                | 1.20              | 1.00                              | 1.20                             | 3.00                                          |      | CUBN         | 11.53                   | No data                        |
| 10        | 16998503        | rs11254299        | 0.95        | 1.00        | A        | T        | 0.33        | Intronic                  | 0.00                | -2.82             | 4.00                              | 2.00                             | 2.00                                          |      | CUBN         | 1.71                    | No data                        |
| 10        | 16999350        | rs7071576         | 0.95        | 1.00        | G        | <b>A</b> | 0.33        | Intronic                  | 0.00                | 0.59              | 2.00                              | 6.00                             | 2.00                                          |      | CUBN         | 0.74                    | 3a                             |
| 10        | 17003751        | rs28499209        | 0.95        | 1.00        | C        | T        | 0.33        | Intronic                  | 0.05                | 0.00              | 1.00                              | 1.00                             | 1.80                                          |      | CUBN         | 1.69                    | No data                        |
| 16        | 86691273        | rs59689370        | 0.91        | 0.97        | <b>C</b> | A        | 0.21        | Transcript                | 0.25                | 0.16              | 2.04                              | 3.00                             | 1.00                                          |      | RP11-58A18.1 | 5.74                    | No data                        |
| <b>16</b> | <b>86695720</b> | <b>rs16941835</b> | <b>1.00</b> | <b>1.00</b> | <b>G</b> | <b>C</b> | <b>0.21</b> | <b>Regulatory Feature</b> | <b>0.04</b>         | <b>1.11</b>       | <b>95.44</b>                      | <b>57.32</b>                     | <b>4.00</b>                                   |      | <b>NA</b>    | <b>0.03</b>             | <b>No data</b>                 |
| 16        | 86696224        | rs36005190        | 0.99        | 1.00        | G        | C        | 0.21        | Transcript                | 0.00                | -8.15             | 50.80                             | 40.28                            | 4.00                                          |      | RP11-58A18.1 | 0.08                    | 5                              |
| 16        | 86697008        | rs7199483         | 0.98        | 0.99        | C        | T        | 0.21        | Transcript                | 0.00                | -0.10             | 22.20                             | 26.72                            | 3.00                                          |      | RP11-58A18.1 | 3.04                    | 5                              |
| 16        | 86699767        | rs899245          | 0.82        | 0.97        | <b>T</b> | A        | 0.24        | Transcript                | 0.00                | -2.29             | 9.12                              | 18.96                            | 3.32                                          |      | RP11-58A18.1 | 1.63                    | No data                        |
| 16        | 86700030        | rs899244          | 0.86        | 0.97        | C        | T        | 0.23        | Transcript                | 0.00                | 0.14              | 5.52                              | 9.72                             | 2.68                                          |      | RP11-58A18.1 | 1.82                    | No data                        |
| 16        | 86701111        | rs35295491        | 0.85        | 0.97        | G        | A        | 0.23        | Transcript                | 0.08                | 0.31              | 7.32                              | 17.00                            | 8.00                                          |      | RP11-58A18.1 | 4.92                    | 6                              |
| 16        | 86701426        | rs7203324         | 0.85        | 0.97        | C        | G,T      | 0.23        | Transcript                | 0.16                | 0.05              | 10.00                             | 11.00                            | 3.00                                          |      | RP11-58A18.1 | 3.43,4.05               | 6                              |
| 16        | 86701519        | rs34740226        | 0.85        | 0.97        | <b>A</b> | G        | 0.23        | Transcript                | 0.00                | -0.09             | 5.80                              | 8.60                             | 1.00                                          |      | RP11-58A18.1 | 0.59                    | 6                              |

|    |          |            |      |      |    |   |      |                    |      |       |       |       |       |   |              |      |         |
|----|----------|------------|------|------|----|---|------|--------------------|------|-------|-------|-------|-------|---|--------------|------|---------|
| 16 | 86701780 | rs7184245  | 0.84 | 0.96 | G  | A | 0.23 | Regulatory Feature | 0.00 | 0.84  | 18.08 | 22.44 | 5.00  | 2 | NA           | 2.51 | 4       |
| 16 | 86702158 | rs7186373  | 0.85 | 0.97 | C  | T | 0.23 | Regulatory Feature | 0.14 | 1.60  | 36.92 | 28.88 | 15.72 | 1 | NA           | 4.59 | 5       |
| 16 | 86702285 | rs7192259  | 0.85 | 0.97 | T  | A | 0.23 | Transcript         | 0.00 | -0.01 | 22.80 | 28.04 | 7.40  |   | RP11-58A18.1 | 2.77 | 5       |
|    |          |            |      |      |    |   |      | NonCoding          |      |       |       |       |       |   |              |      |         |
| 16 | 86702431 | rs12443866 | 0.85 | 0.97 | C  | T | 0.23 | Transcript         | 0.00 | -1.64 | 7.44  | 19.64 | 3.52  |   | RP11-58A18.1 | 0.70 | No data |
| 16 | 86702768 | rs12928518 | 0.85 | 0.97 | T  | C | 0.23 | Intergenic         | 0.01 | 0.46  | 5.00  | 28.08 | 4.20  |   | RP11-58A18.1 | 1.37 | 5       |
| 16 | 86703086 | rs12923555 | 0.85 | 0.97 | G  | C | 0.23 | Intergenic         | 0.00 | -1.70 | 5.08  | 17.00 | 5.88  |   | RP11-58A18.1 | 0.15 | 5       |
| 16 | 86703949 | rs62042090 | 0.85 | 0.97 | C  | T | 0.23 | Regulatory Feature | 0.01 | 0.95  | 7.28  | 13.76 | 9.56  | 1 | NA           | 6.29 | 5       |
| 16 | 86705372 | rs11117200 | 0.85 | 0.97 | G  | A | 0.23 | Intergenic         | 0.00 | -3.85 | 8.12  | 23.92 | 5.00  |   | RP11-58A18.1 | 0.84 | 4       |
| 16 | 86706795 | rs35285681 | 0.85 | 0.97 | G  | T | 0.23 | Intergenic         | 0.30 | 1.67  | 11.44 | 21.40 | 3.00  | 2 | RP11-58A18.1 | 8.49 | 4       |
| 16 | 86706867 | rs60933831 | 0.85 | 0.97 | T  | A | 0.23 | Intergenic         | 0.14 | -1.28 | 6.40  | 16.40 | 2.08  | 2 | RP11-58A18.1 | 4.03 | 2b      |
| 16 | 86708914 | rs16941856 | 0.85 | 0.96 | C  | T | 0.23 | Intergenic         | 0.22 | 0.14  | 3.00  | 9.56  | 2.00  |   | NA           | 5.63 | 5       |
| 16 | 86709958 | rs58938680 | 0.85 | 0.96 | GT | G | 0.23 | Regulatory Feature | 0.14 | 1.35  | 25.32 | 36.40 | 2.56  | 3 | NA           | 5.19 | 2b      |

Chr, chromosome; Ref, reference allele; Alt, alternate allele; DNase, DNase hypersensitivity; GERP, Genomic Evolutionary Rate Profiling; H<sub>3</sub>K<sub>27</sub>Ac, mark found near active regulatory elements; H<sub>3</sub>K<sub>4</sub>Me, mark found near regulatory elements; H<sub>3</sub>K<sub>4</sub>Me<sub>3</sub>, mark found near promoters; TFBS, number of transcription factor binding sites

<sup>a</sup>PhastCons scores >0.3 indicative of conservation

<sup>b</sup>GERP scores indicative >2 are indicative of evolutionary constraint

<sup>c</sup>CADD score >10 indicate a variant is likely deleterious

<sup>d</sup>RegulomeDB scores: 2b, TF binding + any motif + DNase Footprint + DNase peak; 3a, TF binding + any motif + DNase peak; 4, TF binding + DNase peak; 5, TF binding or DNase peak; 6, other.

**Supplementary Table 6: Pathways overrepresented in GWAS regions.** All genes within the LD block containing each tagSNP, or linked to the SNP through functional experiments, were uploaded to the NCI pathway interaction database. Displayed are pathways containing three or more genes.

| <b>Pathway Name</b>                                                        | <b>Biomolecules in Group 1</b>   | <b>P-value</b> |
|----------------------------------------------------------------------------|----------------------------------|----------------|
| Alpha6 beta4 integrin-ligand interactions                                  | LAMA5, LAMB2, LAMC1, LAMC2       | 1.88E-07       |
| a6b1 and a6b4 Integrin signaling                                           | CDH1, LAMA5, LAMB2, LAMC1, LAMC2 | 3.00E-06       |
| BMP receptor signaling                                                     | BMP2, BMP4, GREM1, SMAD7         | 6.10E-05       |
| Beta1 integrin cell surface interactions                                   | LAMA5, LAMB2, LAMC1, LAMC2       | 4.01E-04       |
| Regulation of nuclear SMAD2/3 signaling                                    | CDKN1A, LAMC1, MYC, SMAD7        | 7.25E-04       |
| Stabilization and expansion of the E-cadherin adherens junction            | AQP5, CDH1, LIMA1                | 1.39E-03       |
| Regulation of nuclear beta catenin signaling and target gene transcription | CCND2, CDH1, MYC                 | 7.52E-03       |

**Supplementary Table 7: Relationship between SNP genotype and sex, age at diagnosis of CRC, tumor site (rectal [ICD9:154], colonic [ICD9:153]), stage, family history of CRC ( $\geq 1$  affected first degree relative), MSI status and both KRAS and BRAF mutant status.**

| Feature | No Samples | Studies                       | P-values   |            |            |
|---------|------------|-------------------------------|------------|------------|------------|
|         |            |                               | rs72647484 | rs10904849 | rs16941835 |
| Age     | 4,325      | UK1, Scotland1, VQ58 and COIN | 0.77       | 0.51       | 0.97       |
| Gender  | 6,622      | All                           | 0.41       | 0.15       | 0.16       |
| Site    | 2,868      | VQ58 and COIN                 | 0.82       | 0.60       | 0.39       |
| Stage   | 1,401      | UK1 and VQ58                  | 0.76       | 0.42       | 0.23       |
| MSI     | 1,260      | UK1 and COIN                  | 0.14       | 0.96       | 0.92       |
| KRAS    | 1,623      | COIN                          | 0.03       | 0.86       | 0.08       |
| BRAF    | 1,470      | COIN                          | 0.47       | 0.11       | 0.63       |

Supplementary Figure 1:

(a) UK1 ( $\lambda=1.02$ )

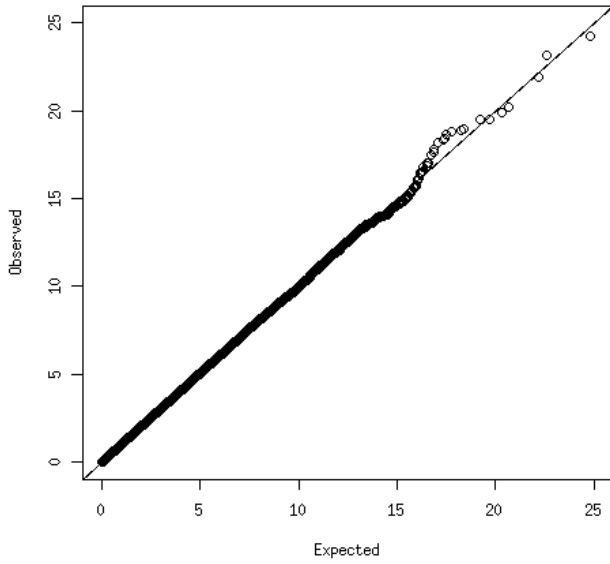

(b) Scotland1 ( $\lambda=1.01$ )

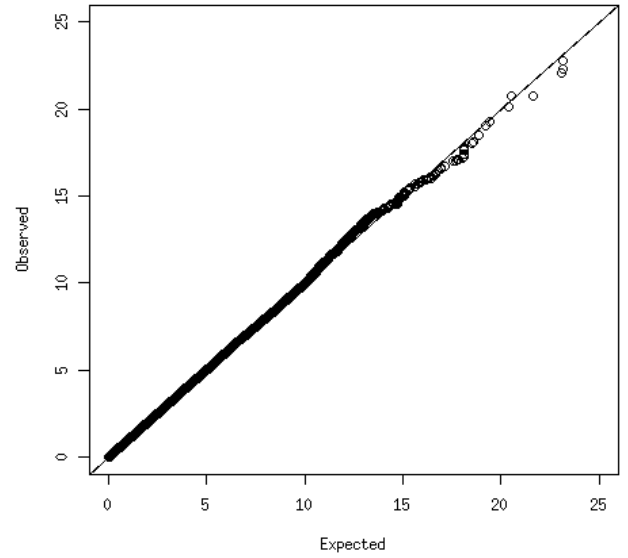

(c) VQ ( $\lambda=1.01$ )

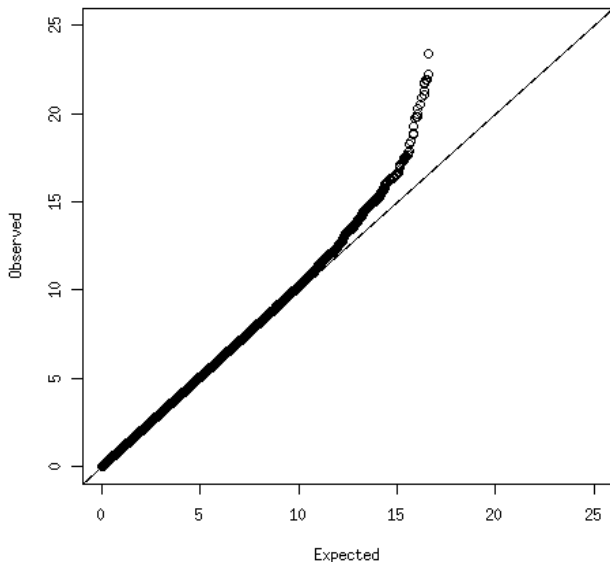

(d) CCFR1 ( $\lambda=1.02$ )

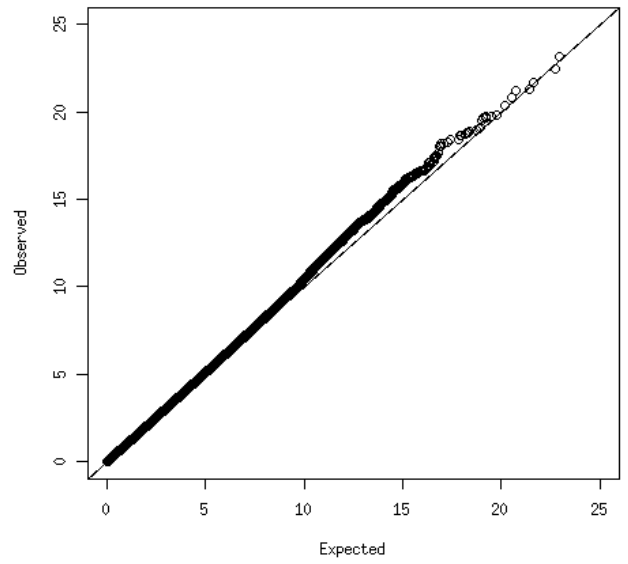

(e) CCFR2 ( $\lambda=1.03$ )

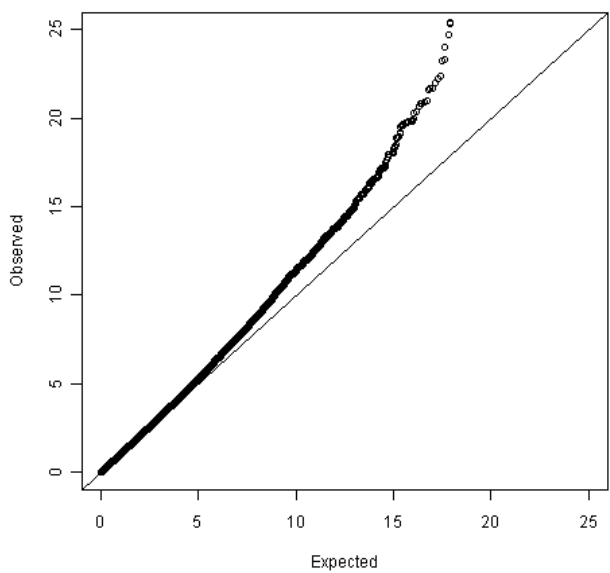

(f) COIN ( $\lambda=1.05$ )

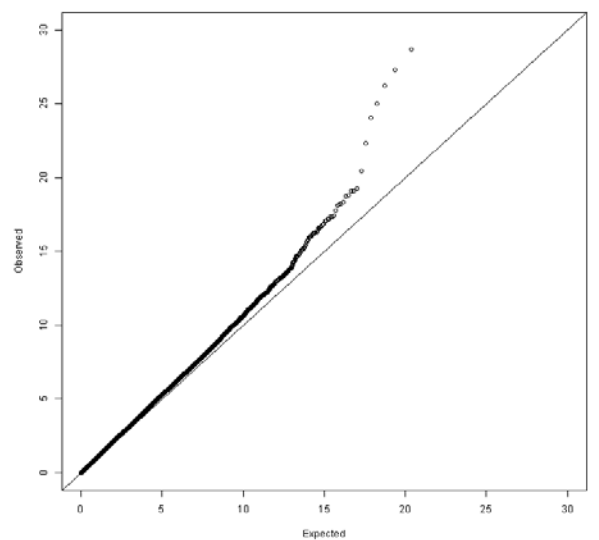

**(g) UK1 ( $\lambda=1.03$ )**

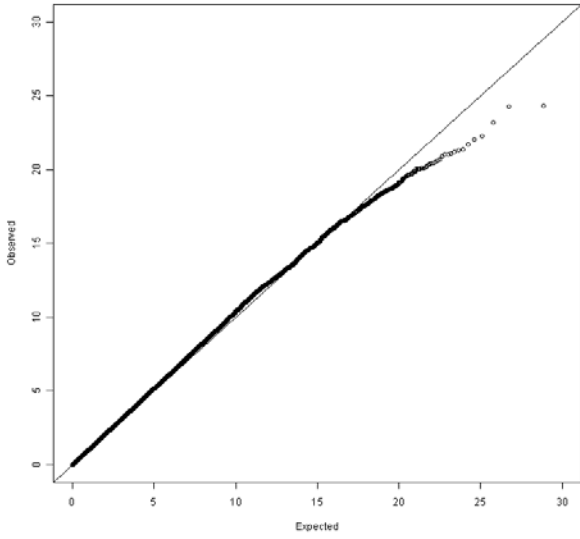

**(h) Scotland1 ( $\lambda=1.04$ )**

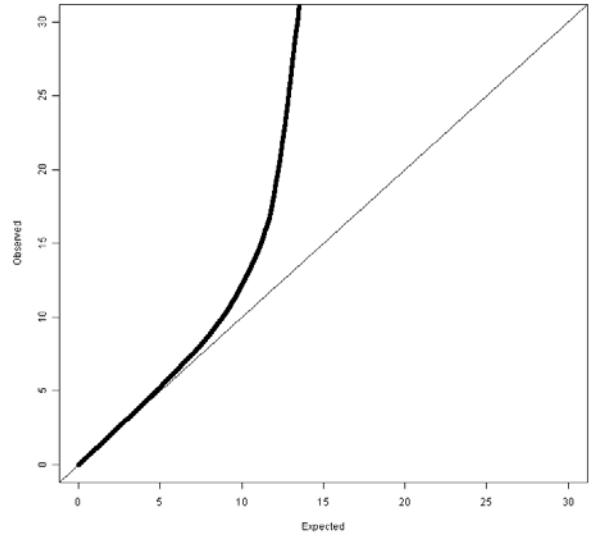

**(i) VQ ( $\lambda=1.04$ )**

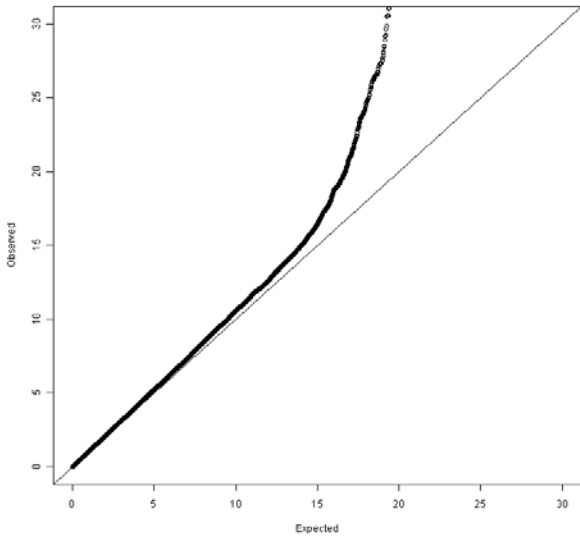

**(j) CCFR1 ( $\lambda=1.03$ )**

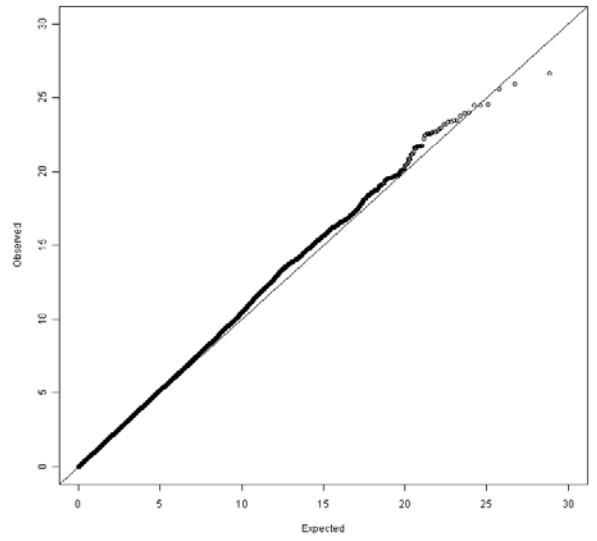

**(k) CCFR2 ( $\lambda=1.08$ )**

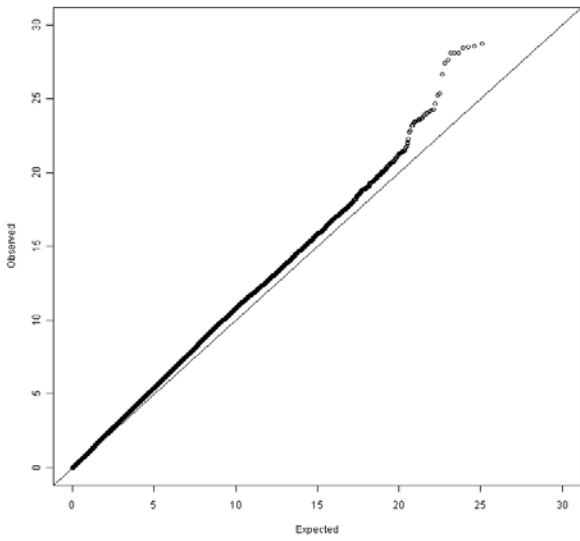

**(l) COIN ( $\lambda=1.10$ )**

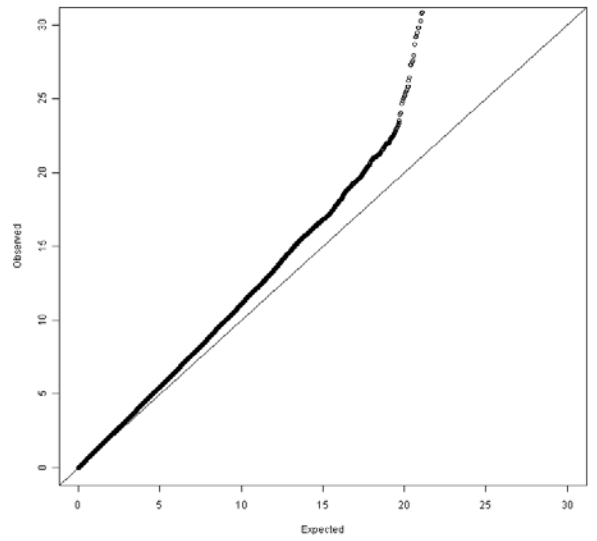

(m)

Meta-analysis ( $\lambda=1.10$ )

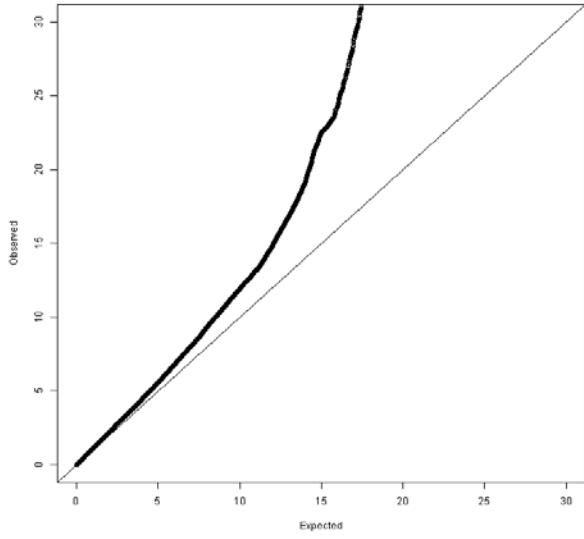



Supplementary Figure 2:

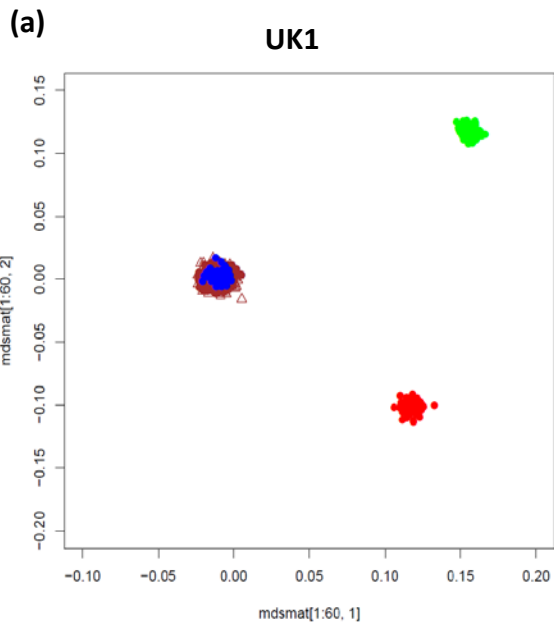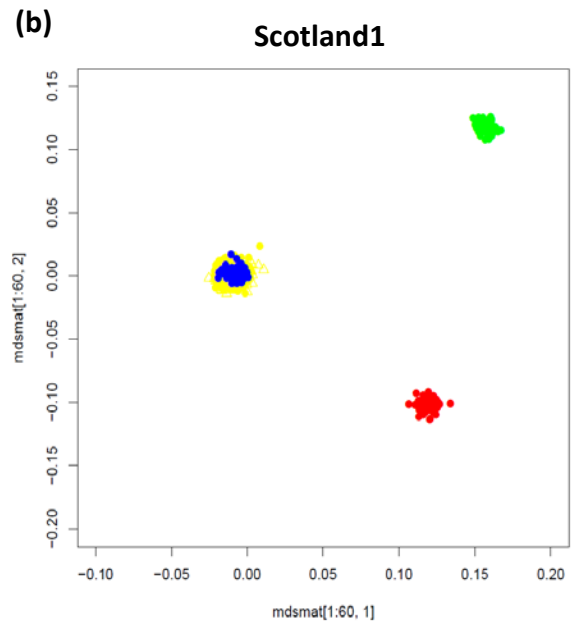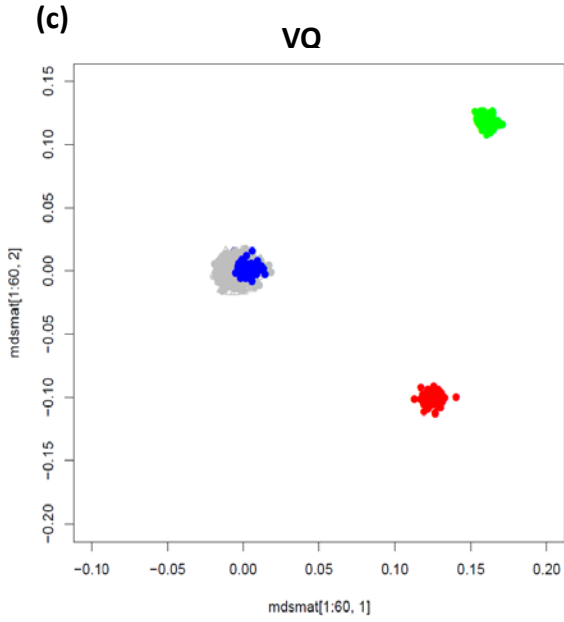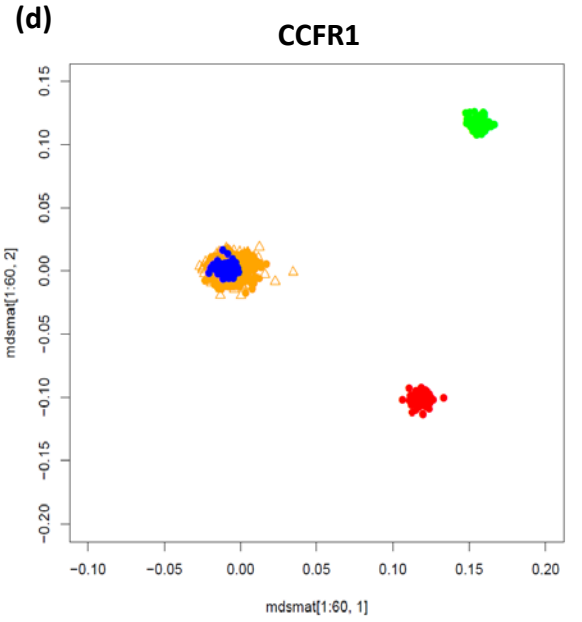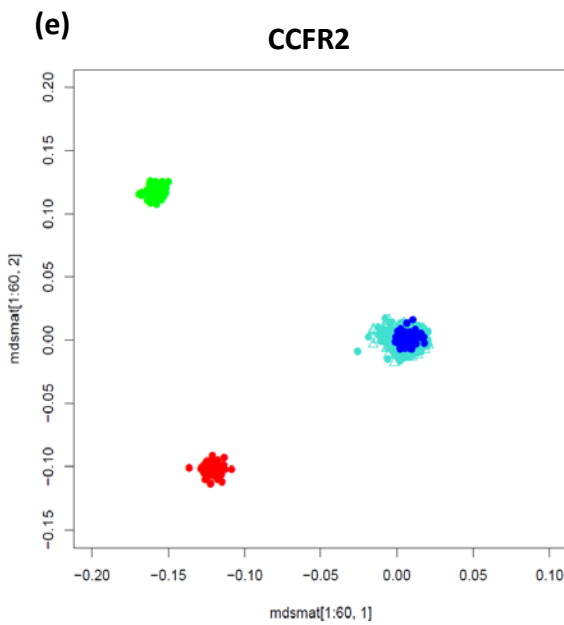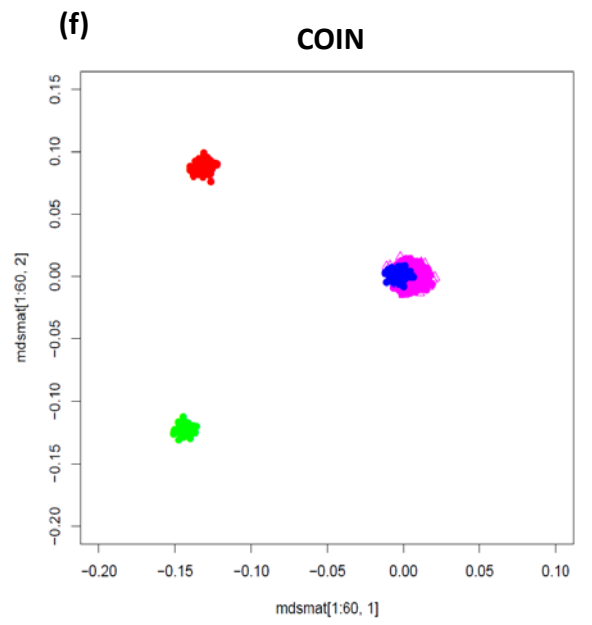

|                 | UK1                               | Scotland1                             | VQ58                                  | CCFR1                                 | CCFR2                               | COIN                                  |
|-----------------|-----------------------------------|---------------------------------------|---------------------------------------|---------------------------------------|-------------------------------------|---------------------------------------|
| <b>pre-QC</b>   | <b>940 cases<br/>965 controls</b> | <b>1,012 cases<br/>1,012 controls</b> | <b>1,800 cases<br/>2,690 controls</b> | <b>1,290 cases<br/>1,055 controls</b> | <b>796 cases<br/>2,236 controls</b> | <b>2,244 cases<br/>2,162 controls</b> |
| Call rate       | 15                                | 15                                    | 0                                     | 84                                    | 0                                   | 122                                   |
| Ethnicity       | 54                                | 9                                     | 0                                     | 67                                    | 2                                   | 130                                   |
| Relatedness     | 26                                | 9                                     | 9                                     | 13                                    | 0                                   | 4                                     |
| Sex discrepancy | 3                                 | 15                                    | 1                                     | 4                                     | 1                                   | 8                                     |
| Other           | 17                                | 5                                     | 0                                     | 3                                     | 0                                   | 30                                    |
| <b>post-QC</b>  | <b>890 cases<br/>900 controls</b> | <b>973 cases<br/>998 controls</b>     | <b>1,794 cases<br/>2,686 controls</b> | <b>1,175 cases<br/>999 controls</b>   | <b>795 cases<br/>2,234 controls</b> | <b>1,950 cases<br/>2,162 controls</b> |

**Supplementary Figure 3: Details of the quality control filters applied to each GWAS.** Samples were excluded due to call rate (<95% or failed genotyping), Ethnicity (principle components analysis or other samples reported to be not of white, European descent), Relatedness (any individuals found to be duplicated or related within or between data sets through IBS), sex discrepancies or others (cases found to contain a previously reported susceptibility allele, controls with a 1<sup>st</sup> degree relative with CRC, low concordance of genotyping in duplicates or samples which have been subsequently withdrawn from a study).
